# Supplementary material for: Chondroitin sulfate-polyethylenimine copolymer-coated superparamagnetic iron oxide nanoparticles as an efficient magneto-gene carrier for microRNA-encoding plasmid DNA delivery
Source: Royal Society of Chemistry journal article supplement (doi:10.1039/c5nr01404b), 2015-01-01
Supplement: c5nr01404b1.pdf [file c5nr01404b1.pdf]

**Table S1.** Hydrodynamic diameters ( $D_h$ ) and zeta-potentials of CPIO prepared from different weight ratios of CP and PAAIO.

|           | $D_h$ (nm)  | Zeta potential | PDI        |
|-----------|-------------|----------------|------------|
| PAAIO     | 60.15±0.67  | -15.6±2.46     | 0.26±0.003 |
| CPIO 1:1* | 162.07±1.07 | 23.83±1.24     | 0.27±0.012 |
| CPIO 2:1* | 136.1±1.18  | 27.73±0.76     | 0.47±0.099 |
| CPIO 4:1* | 113.73±7.4  | 18.60±2.25     | 0.41±0.031 |

\* Different weight ratios of CP:PAAIO in feed.

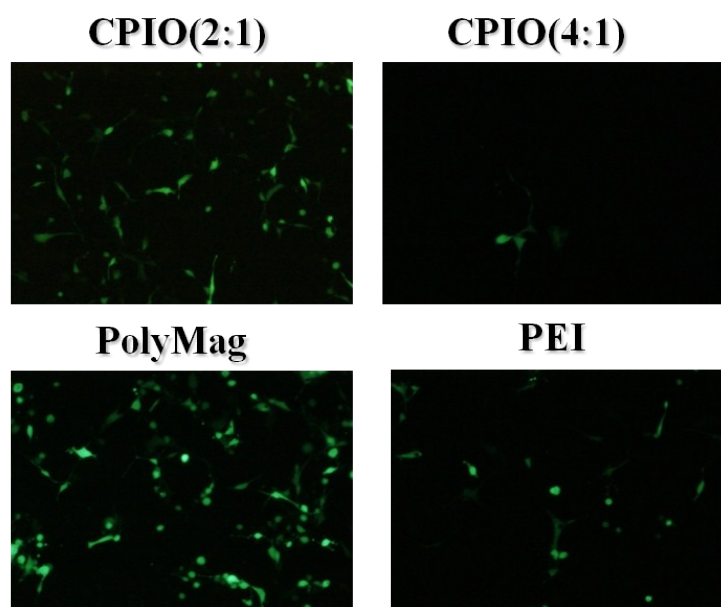

**Fig. S1** GFP expression in U87 cells.

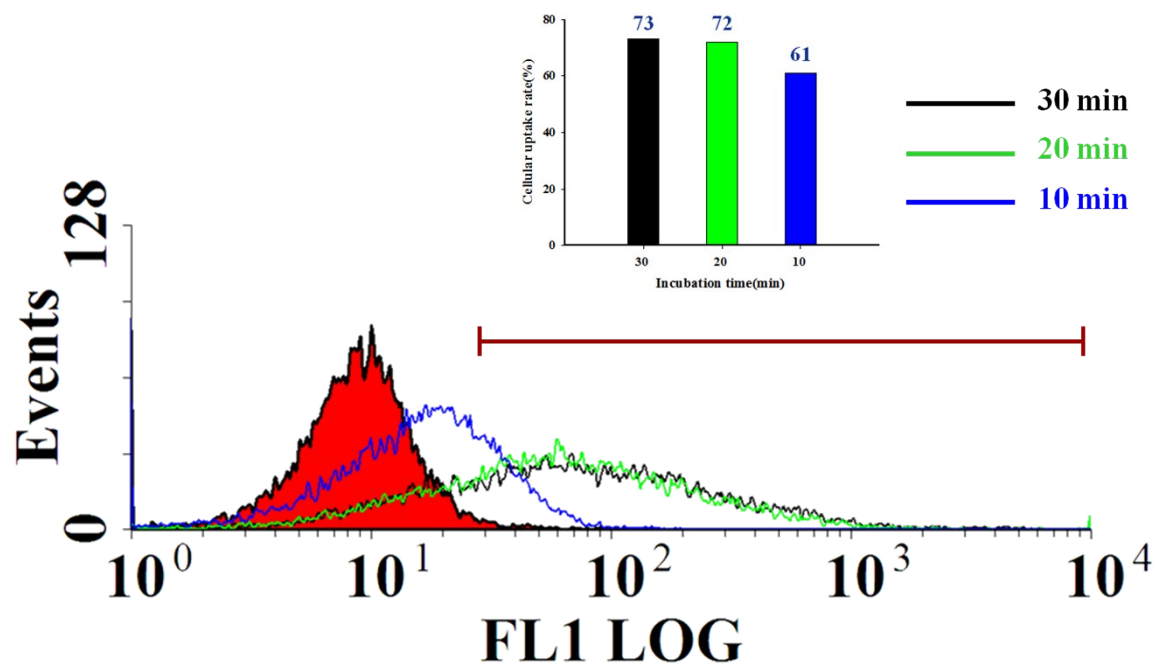

**Fig. S2** The internalization of a magnetoplex into U87 cells with an assisted magnetic field for different time periods using flow cytometry. The CPIO/DNA was prepared at w/w=5.

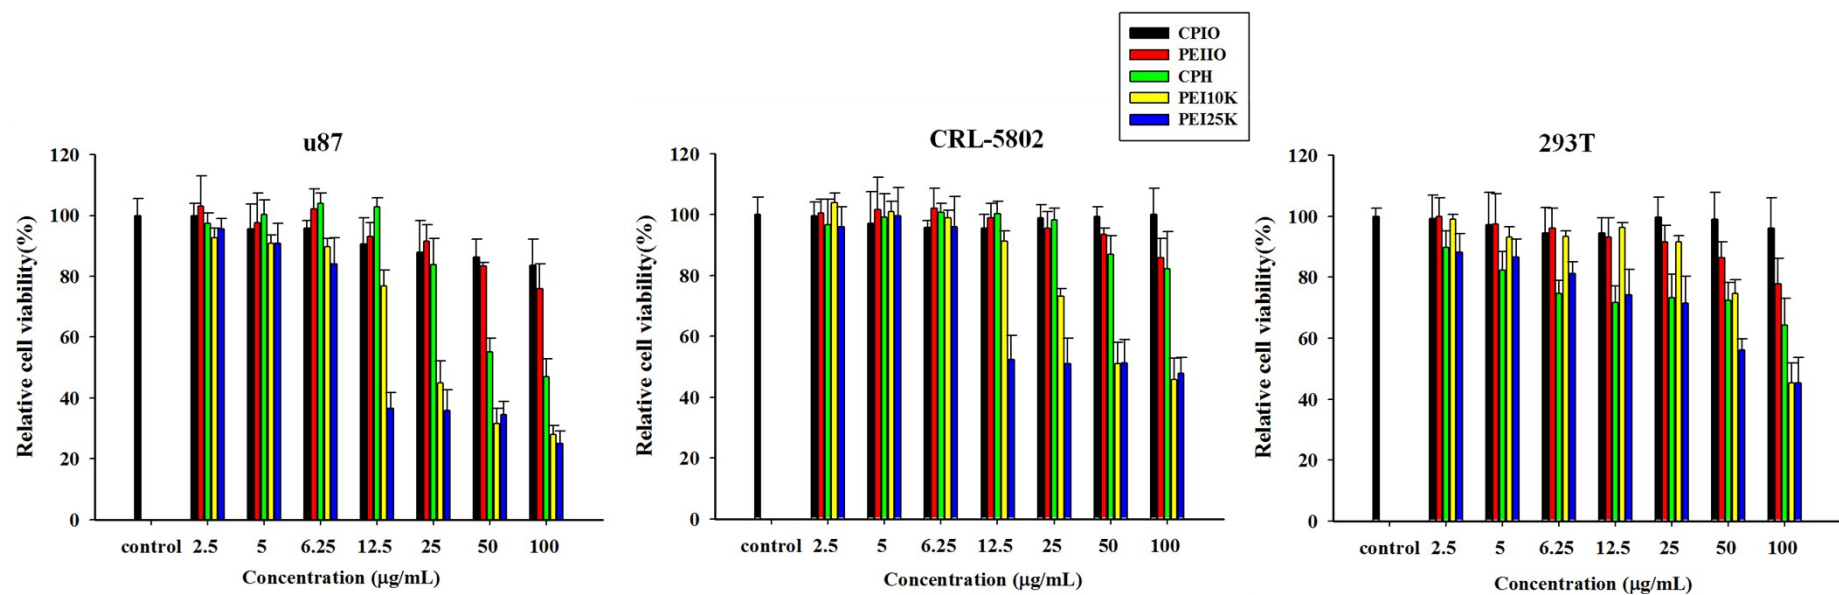

**Fig. S3** Cell viabilities of three cell lines exposed to CPIO (CP coated PAAIO), PEIIO (PEI-25K coated PAAIO), CP with a high content of PEI (CPH), Molecular weight of PEI at 10 Dalton (PEI-10K), and 25 Dalton (PEI-25K).

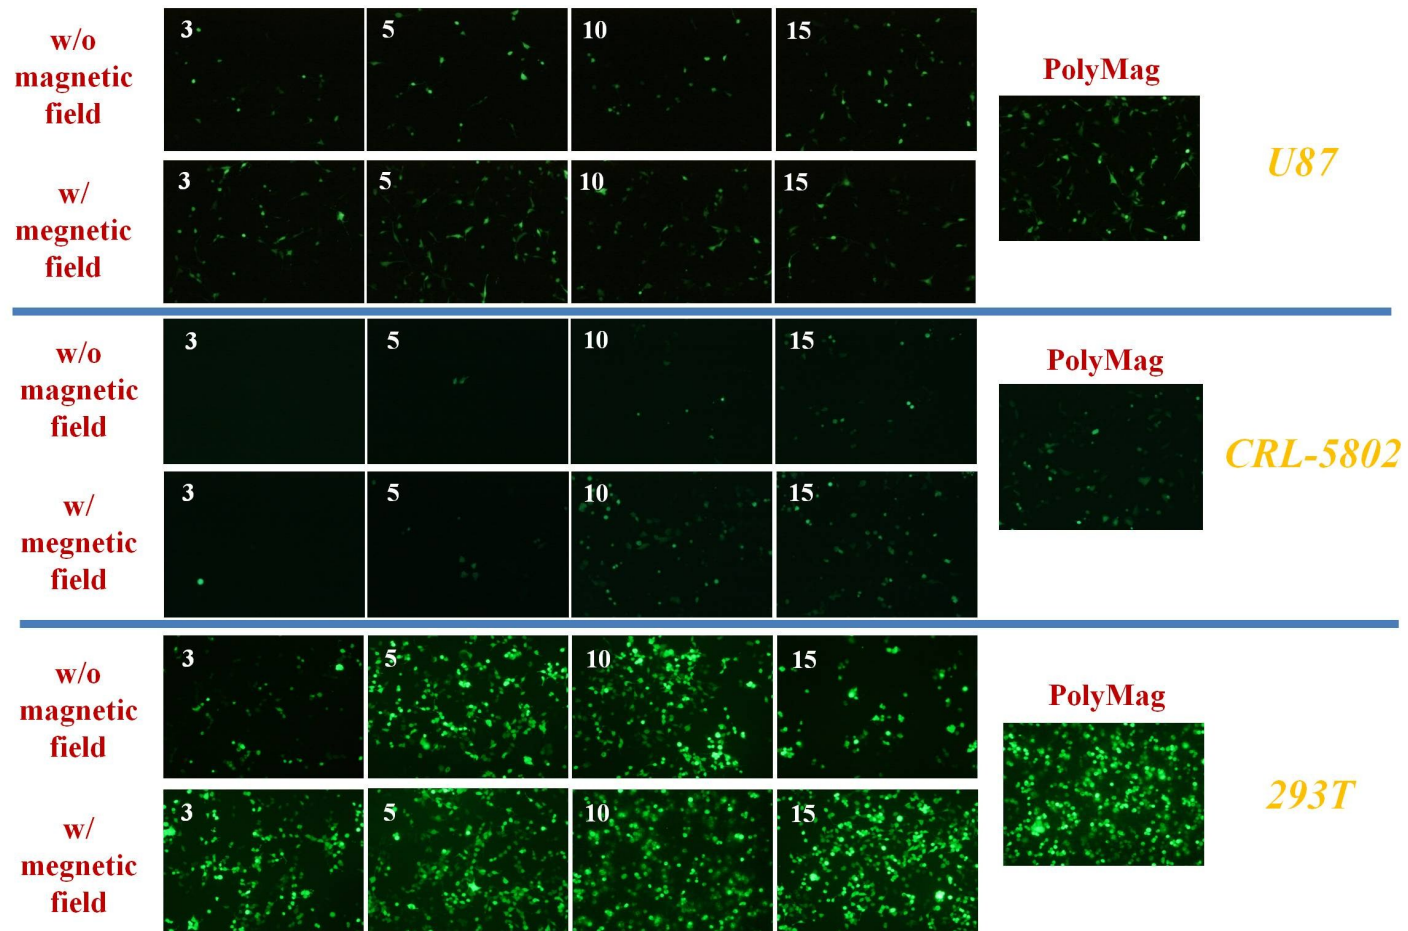

**Fig. S4** GFP expression in U87, CRL-5802, and 293T cells exposed to CPIO/DNA at various weight ratios with (w) or without (w/o) the magnetic field for 20 mins in the medium containing 10% FBS.
